# Supplementary material
Source: PubMed Central journal article supplement (PMC5790183)
Supplement: NIHMS936215-supplement-SUPPLEMENTAL.pdf [file NIHMS936215-supplement-SUPPLEMENTAL.pdf]

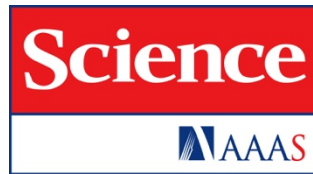

Supplementary Materials for  
**Natural polyreactive IgA antibodies coat the intestinal microbiota**

Jeffrey J. Bunker, Steven A. Erickson, Theodore M. Flynn, Carole Henry, Jason C. Koval, Marlies Meisel, Bana Jabri, Dionysios A. Antonopoulos, Patrick C. Wilson, and Albert Bendelac \*

\*Correspondence to: Albert Bendelac [abendela@bsd.uchicago.edu](mailto:abendela@bsd.uchicago.edu)

**This PDF file includes:**

Figures S1 to S14  
Table S1

**Other Supplementary Material for this manuscript includes the following:**

Database S1 (as Excel file)  
References (90-94)

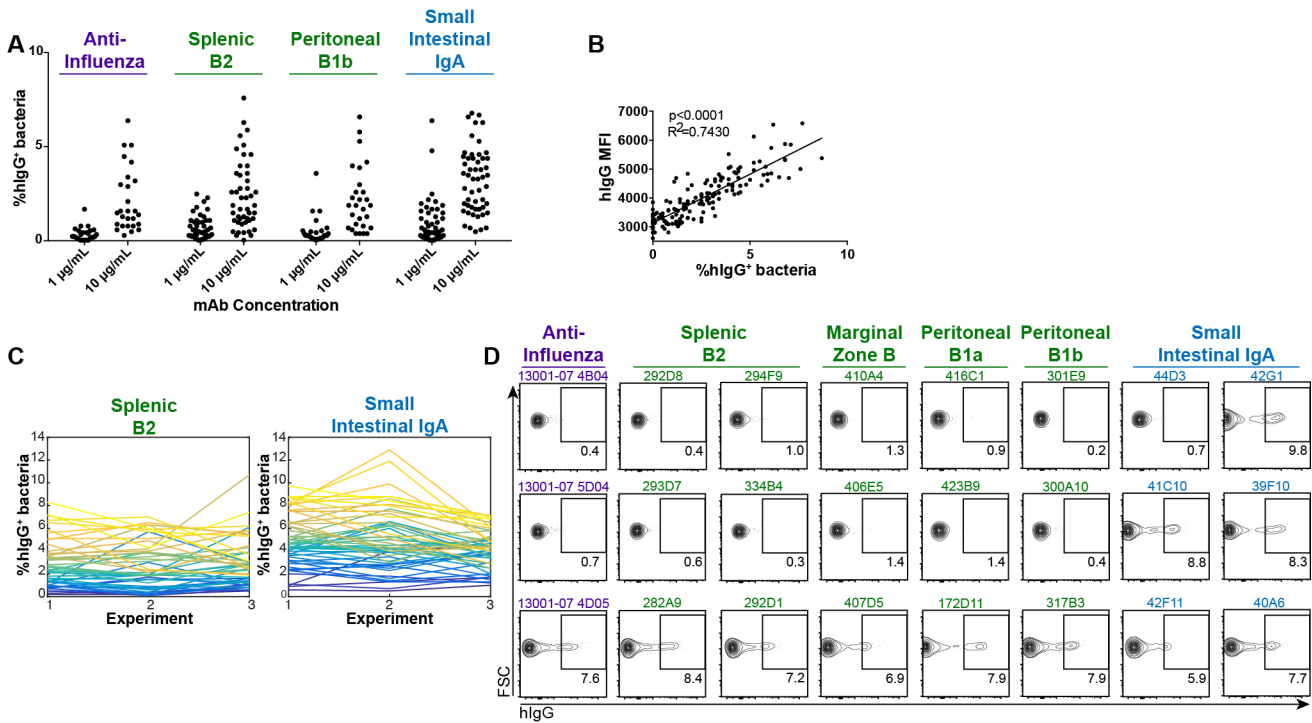

**Figure S1. Reproducibility of mAb staining of microbiota.** (A) Percent hlgG<sup>+</sup> of *Rag1*<sup>-/-</sup> SI microbiota stained with mAbs from indicated panels at indicated concentrations. Representative of multiple independent experiments. (B) Correlation of %hlgG<sup>+</sup> bacteria and median fluorescence intensity (MFI) within the positive gate. P and R<sup>2</sup> values calculated by linear regression. (C) Reproducibility of microbiota staining. Percent hlgG<sup>+</sup> bacteria of *Rag1*<sup>-/-</sup> SI microbiota stained with mAbs from indicated panels in three independent experiments. Independent preparations of SI microbiota were isolated from three distinct cohorts of *Rag1*<sup>-/-</sup> mice from our colony and stained on three separate days. The average standard deviation across experiments was 1.00% hlgG<sup>+</sup>. Lines connect individual mAbs across experiments. Each mAb was assigned a unique color according to its rank order within its panel in experiment 1, with purple being the lowest rank and yellow the highest; color assignment was performed separately for B2 and IgA panels. (D) Representative flow cytometry plots depicting staining of *Rag1*<sup>-/-</sup> SI microbiota by indicated mAbs and panels. Gated on FSC<sup>+</sup>SSC<sup>+</sup>SYTO BC<sup>+</sup>DAPI<sup>-</sup> cells. Plots are representative of multiple independent experiments.

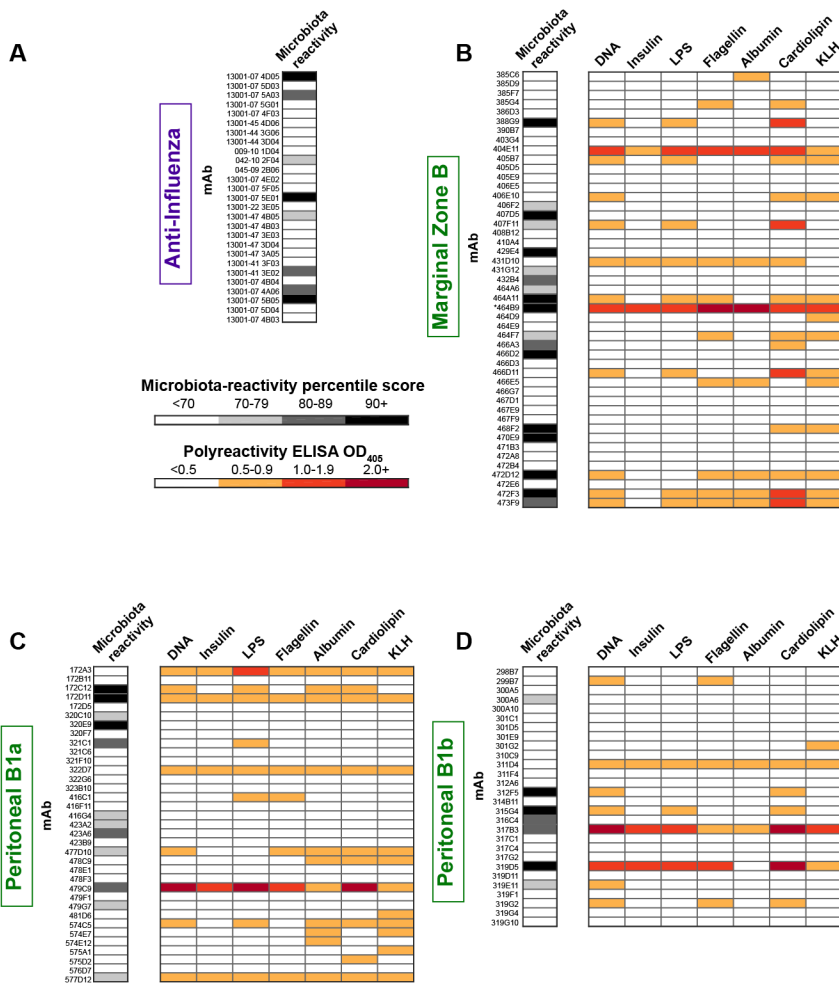

**Figure S2. Reactivities of individual mAbs from naïve B cell subsets or anti-influenza panels. (A-D)** Microbiota-reactivity percentile scores and polyreactivity ELISA OD<sub>405</sub> values for individual mAbs from indicated panels. Data are summarized in Fig. 1C-D.

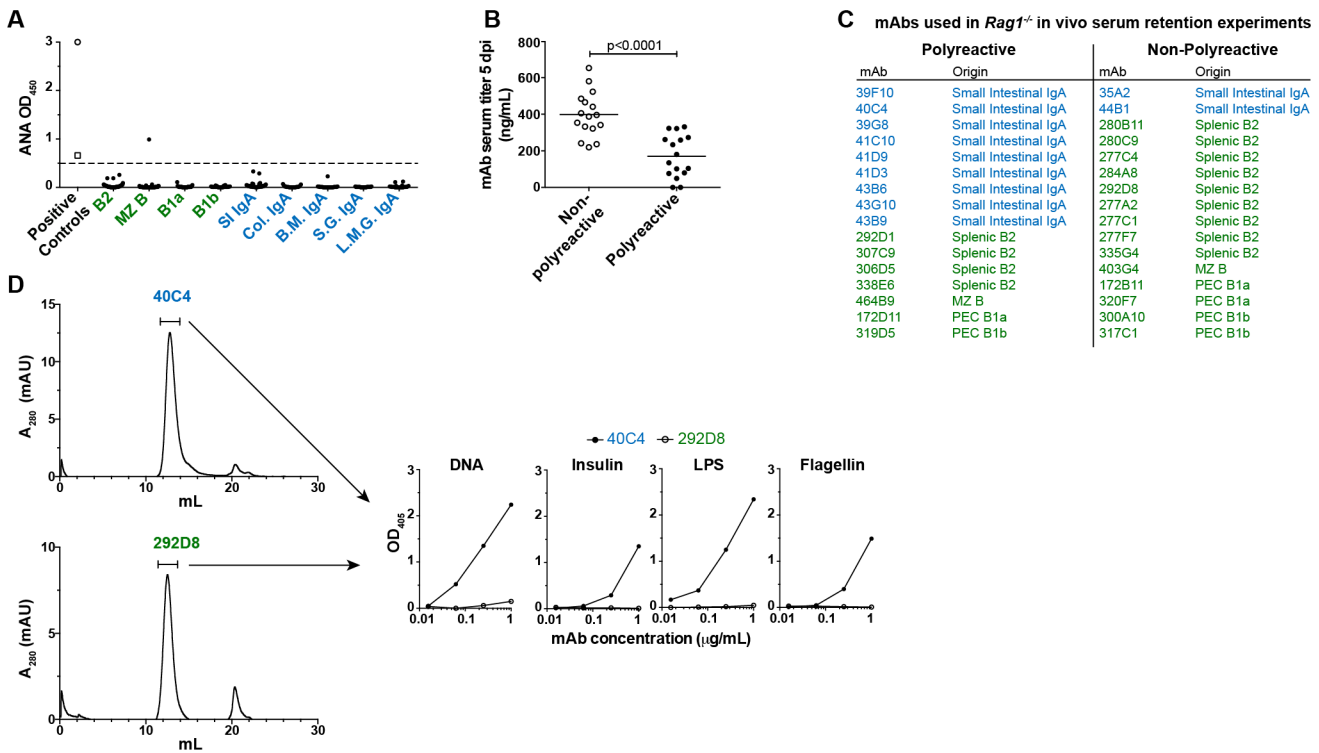

**Figure S3. Anti-nuclear reactivities of individual mAbs, serum retention in vivo, and protein quality validation of polyreactive mAbs.** (A) HEp2 lysate anti-nuclear antibody (ANA) ELISA. Filled circles indicate individual mAbs and all mAbs shown in Fig. 1 were assayed. Open circle in positive control column indicates 3H9 high positive control mAb; open square indicates low positive control serum provided by the manufacturer; these controls were included on all plates assayed. \* in Fig S2B indicates the single HEp2-reactive MZ B mAb. Data compiled from five independent experiments. (B) Serum concentration of mAbs at 5 days-post-injection (dpi) of 2  $\mu$ g into *Rag1*<sup>-/-</sup> mice. Data compiled from three independent experiments. P value calculated by unpaired t test. (C) List of mAbs used for in vivo serum retention measurements. (D) Size exclusion chromatography  $A_{280}$  trace of indicated mAbs. Brackets indicate monomeric fractions purified and immediately used in polyreactivity ELISAs against indicated antigens (right).

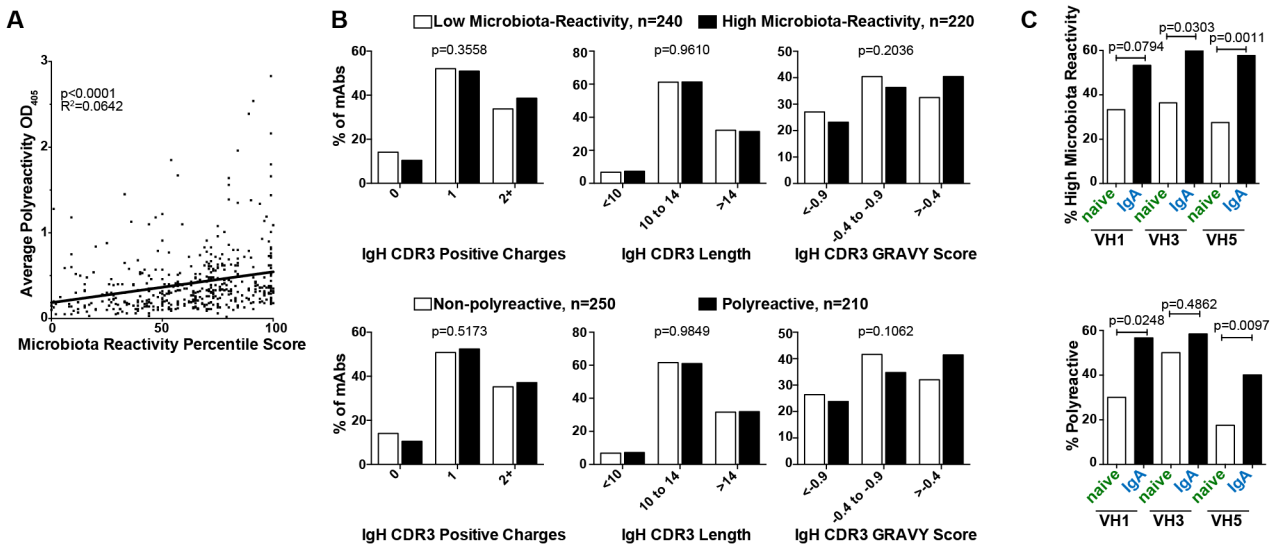

**Figure S4. Correlates of microbiota-reactivity and polyreactivity.** (A) Correlation of average polyreactivity ELISA OD<sub>405</sub> across all seven antigens for individual mAbs with their microbiota reactivity percentile score. Plot includes all mAbs in this study except germline reverted mAbs and anti-influenza panels. P and R<sup>2</sup> values calculated by linear regression. (B) Percent of mAbs among low microbiota-reactivity and high microbiota-reactivity classifications (upper panels) or polyreactive and non-polyreactive classifications (lower panels) with indicated repertoire features. Plots include all mAbs in this study except germline reverted mAbs and anti-influenza panels. P values calculated by chi-square test. (C) Percent high microbiota reactivity (upper panel) or polyreactive mAbs (lower panel) among all naïve B cell or IgA-derived antibodies in this study, grouped according to VH gene usage. V genes other than 1, 3, and 5 were not included as sample numbers were inadequate for statistical comparison due to low or absent representation in many panels. P values calculated by 2x2 Fisher's exact test.

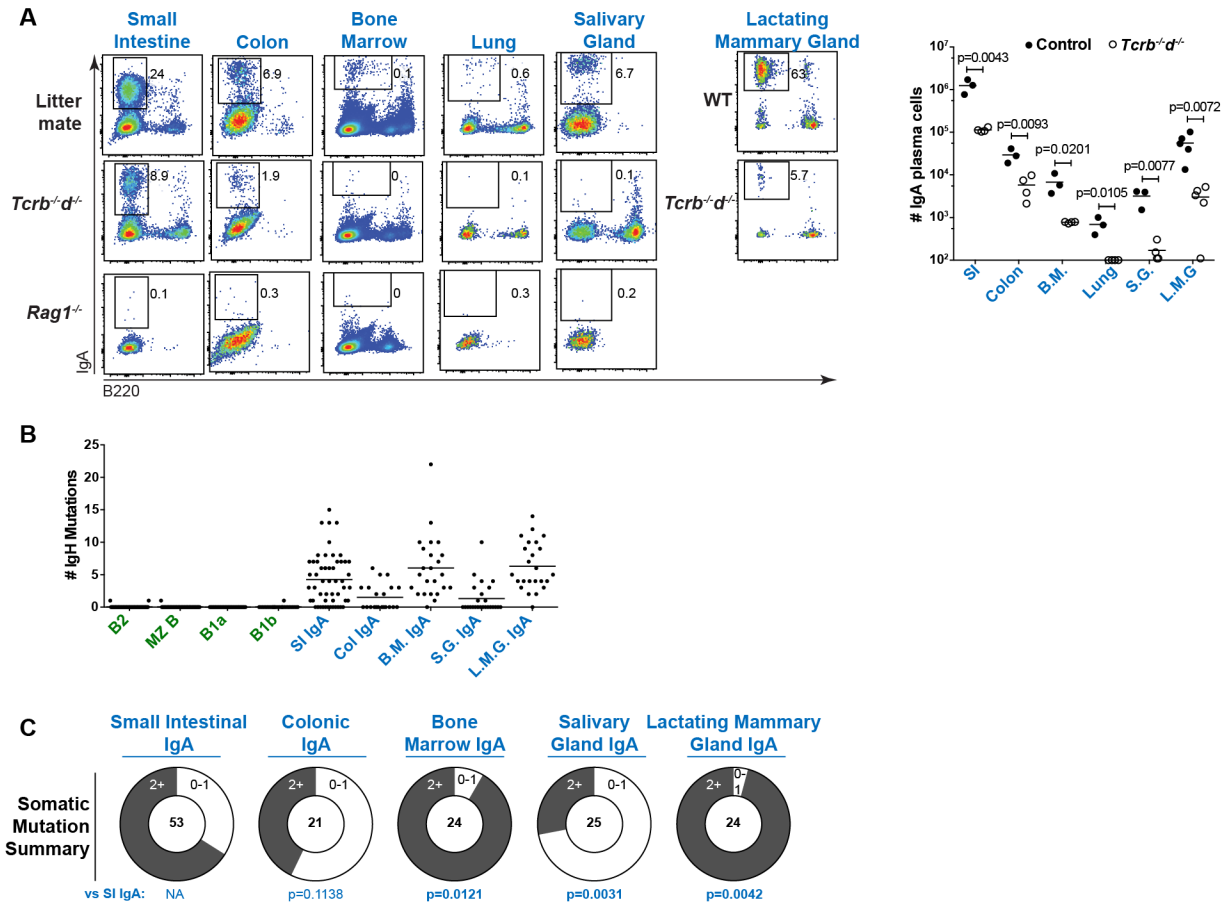

**Figure S5. Contributions of TI or TD pathways to intestinal and extraintestinal IgA populations. (A)** Representative staining and cell number summary of IgA plasma cells in indicated tissues of *Tcrb*<sup>-/-</sup> mice, controls, or *Rag1*<sup>-/-</sup> mice. Mice were compared to co-housed *Tcrb*<sup>+/-</sup> littermates for all tissues except for the lactating mammary gland; this analysis consisted of a separate cohort of 3-7d post-partum *Tcrb*<sup>-/-</sup> females compared to age-matched and co-housed WT B6 females. P values calculated by unpaired t test. Data compiled from two independent experiments. **(B)** Number of IgH somatic mutations for individual mAbs of indicated cellular origin. **(C)** Summary of somatic mutations for indicated panels. P values calculated by Fisher's exact test.

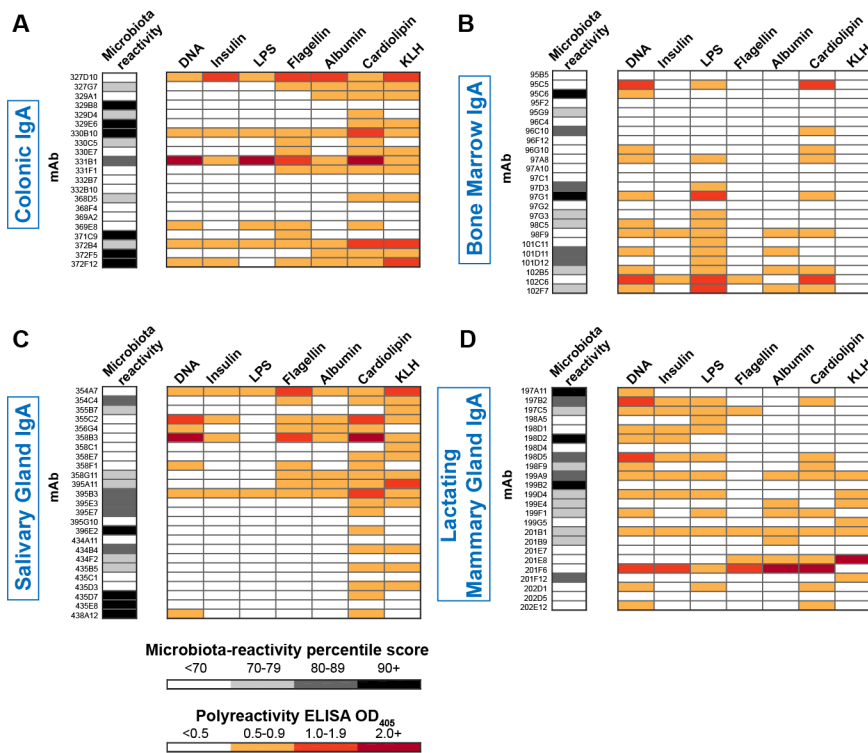

**Figure S6. Reactivities of individual mAbs from colonic and extraintestinal IgA PC populations. (A-D)** Microbiota-reactivity percentile scores and polyreactivity ELISA OD<sub>405</sub> values for individual mAbs from indicated panels. Data are summarized in Fig. 1C-D.

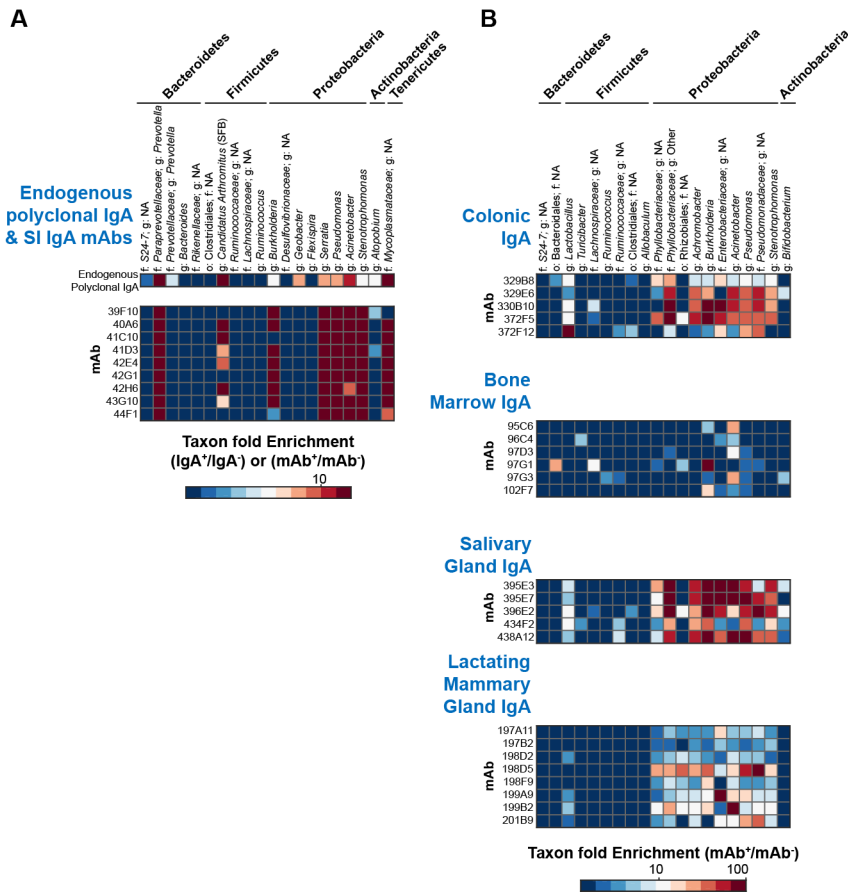

**Figure S7. Microbial targets of individual microbiota-reactive IgA-derived mAbs.** (A-B) Microbial taxa bound by individual mAbs from indicated panels. Enrichment calculated from 16S sequencing data as relative abundance in  $\text{mAb}^+/\text{mAb}^-$  or endogenous polyclonal  $\text{IgA}^+/\text{IgA}^-$  samples purified from WT B6 colonic microbiota in A or *Rag1*<sup>-/-</sup> SI microbiota in B. All mAbs in a given panel were co-purified in the same experiment.



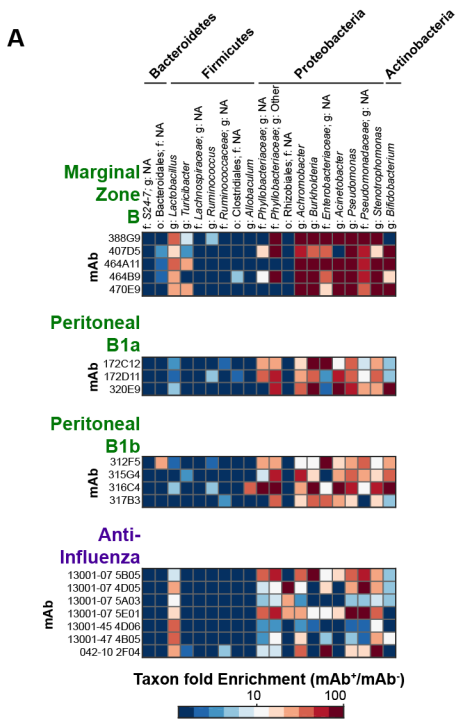

**Figure S8. Microbial targets of individual microbiota-reactive naïve B cell-derived mAbs or anti-influenza controls.** (A) Microbial taxa bound by individual mAbs from indicated panels. Enrichment calculated from 16S sequencing data as relative abundance in mAb<sup>+</sup>/mAb<sup>-</sup> samples purified from *Rag1*<sup>-/-</sup> SI microbiota. All mAbs in a given panel were co-purified in the same experiment.

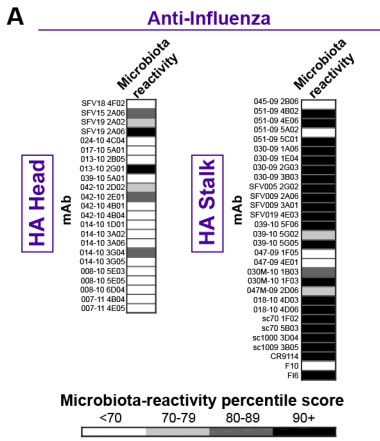

**Figure S9. Microbiota-reactivity of individual mAbs from anti-influenza HA head strain-specific or HA stalk bnAb panels. (A)** Microbiota-reactivity percentile scores assigned according to the HA head distribution and polyreactivity ELISA OD<sub>405</sub> values for individual mAbs from indicated panels. Data are summarized in Fig. 2D.

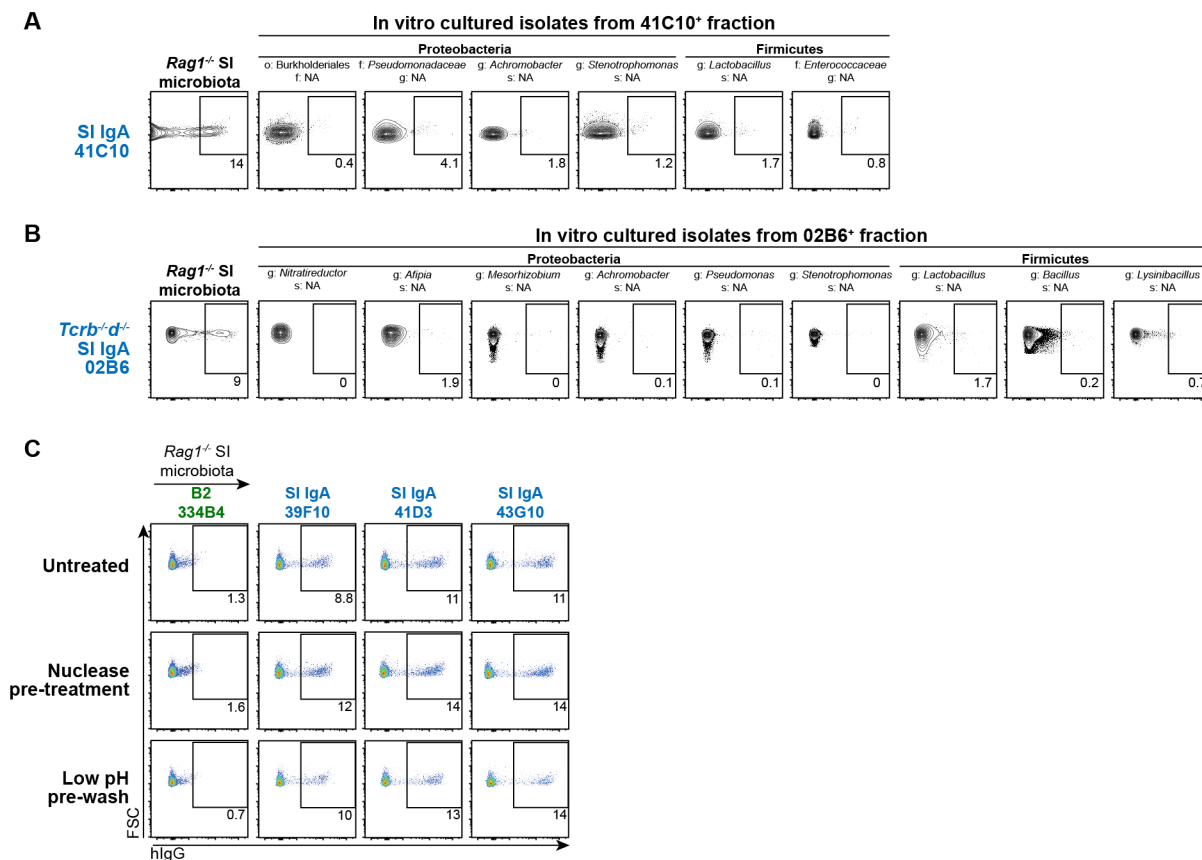

**Figure S10. Reactivity of mAbs to in vitro cultured bacterial strains and ex vivo staining after nuclease pre-treatment or low pH pre-washing.** (A) Flow cytometry staining with SI IgA mAb 41C10 of ex vivo Rag1<sup>-/-</sup> SI microbiota or individual strains cultured in vitro from the 41C10 mAb<sup>+</sup> fraction. All staining was performed at 10 μg/mL. Taxonomy abbreviations: o= order; f=family; g=genus; s=species. Similar negative staining of these in vitro cultured isolates was obtained with an additional 27 microbiota-reactive SI IgA mAbs. (B) Flow cytometry staining with mAb 02B6 of ex vivo Rag1<sup>-/-</sup> SI microbiota or individual strains cultured in vitro from the 02B6 mAb<sup>+</sup> fraction. All staining was performed at 10 μg/mL. (C) mAb staining of ex vivo Rag1<sup>-/-</sup> SI microbiota that was untreated, pre-treated with nuclease, or pre-washed with glycine-HCl pH 3.0.

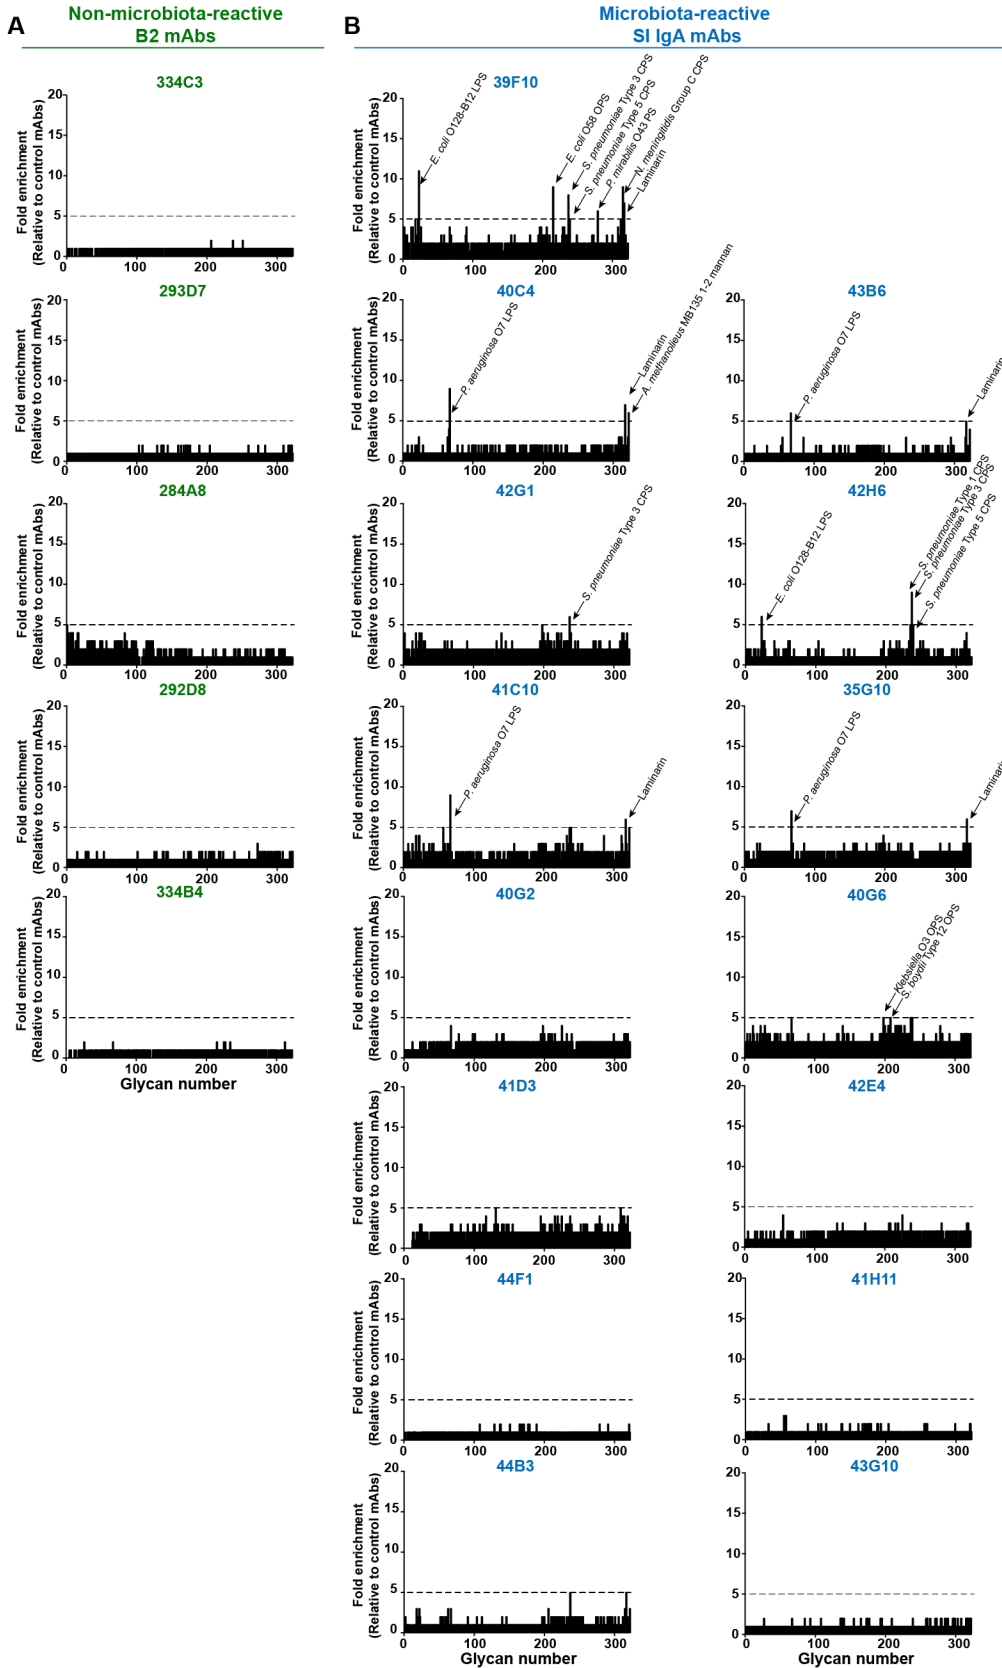

**Figure S11. Microbial glycan microarray analysis of individual mAbs.** Microbial glycan microarray data for (A) Indicated negative control B2 mAbs selected based on lack of microbiota-reactivity or (B) microbiota-reactive SI IgA mAbs. Data expressed as enrichment over average background of six B2 mAb negative controls. Annotated peaks showed >5-fold enrichment. Data compiled from two independent experiments.

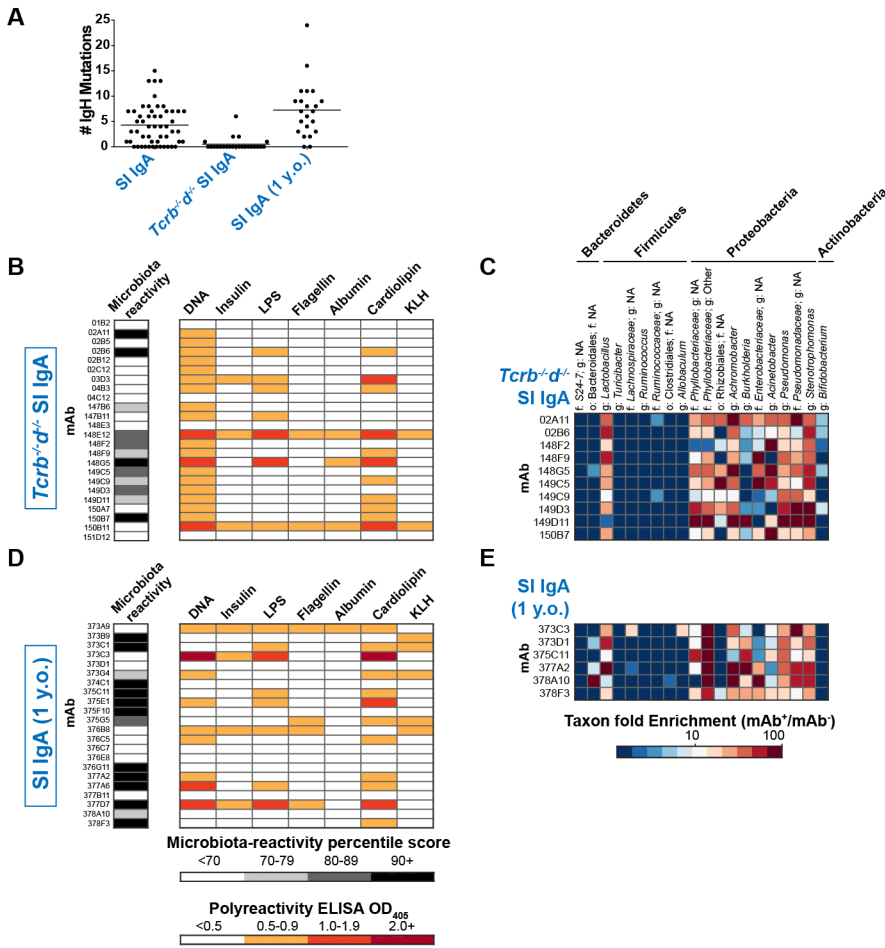

**Figure S12. Reactivities of individual T-dependent or T-independent SI IgA mAbs.** (A) Number of IgH somatic mutations for individual mAbs from indicated SI IgA panels. (B, D) Microbiota-reactivity percentile scores and polyreactivity ELISA OD<sub>405</sub> values for indicated mAbs and panels. Data summarized in Fig. 3B-C. (C, E) Microbial taxa bound by indicated mAbs and panels. Enrichment calculated from 16S sequencing data as relative abundance in mAb<sup>+</sup>/mAb<sup>-</sup> samples purified from *Rag1*<sup>-/-</sup> SI microbiota. All mAbs in a given panel were co-purified in the same experiment.

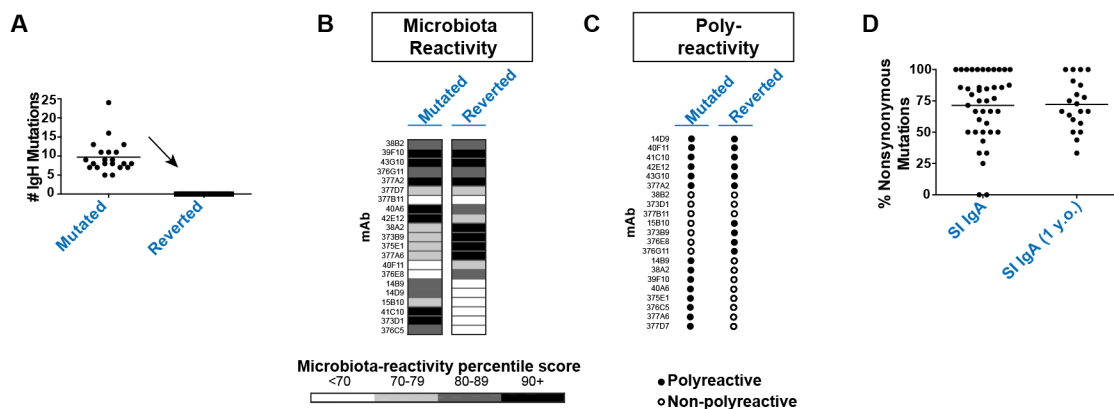

**Figure S13. Reactivities of individual mutated or germline reverted SI IgA mAbs.** (A) IgH somatic mutations in mAbs selected for reversion to germline. IgK chains were similarly reverted. (B) Microbiota-reactivity percentile scores and (C) polyreactivity ELISA scoring of indicated mutated or germline reverted mAbs. (D) Percent nonsynonymous mutations among individual mutated mAbs in indicated panels.

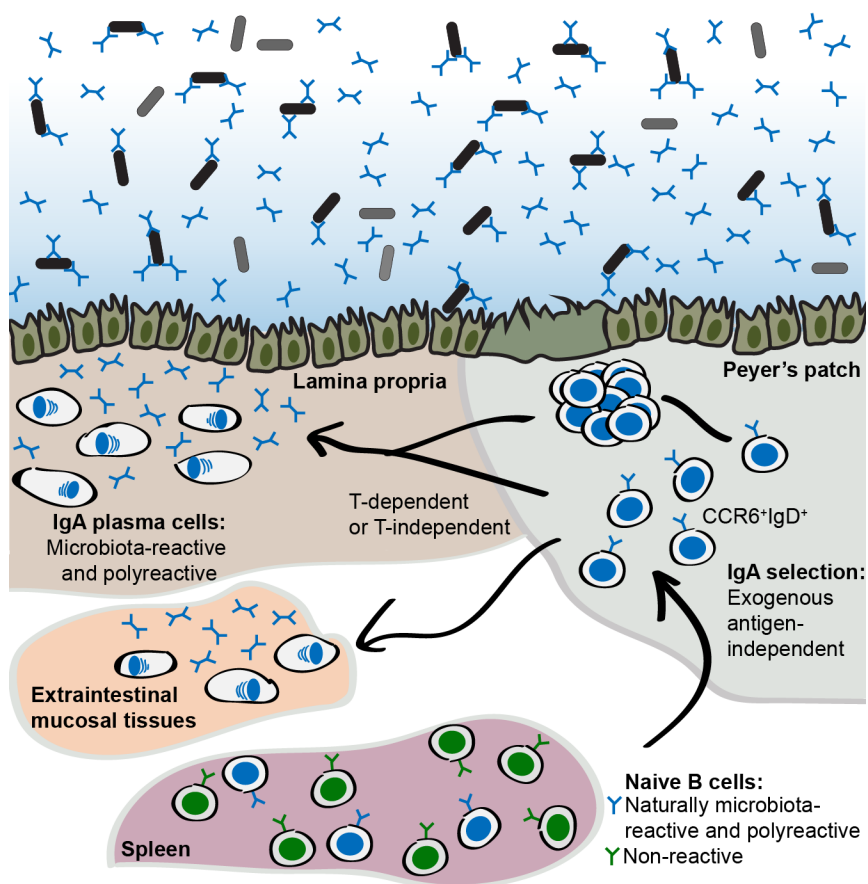

**Figure S14. Summary model for selection of microbiota-reactive and polyreactive IgAs.** Microbiota-reactive and polyreactive specificities occur naturally at frequencies of ~30% in the repertoires of all naïve B cell subsets. Upon trafficking through Peyer's patches, cells expressing these specificities are selected to divide via a natural, exogenous antigen-independent mechanism. Cells that undergo IgA selection upregulate CCR6, which facilitates receipt of local factors that direct IgA class-switch recombination and gut imprinting. Cells then proceed through either T-dependent or T-independent pathways that instruct differentiation to IgA plasma cells. Cells migrate to the intestinal lamina propria or to extraintestinal tissues and secrete specificities that naturally bind a diverse but defined subset of commensal microbiota.

**Table S1. Recipe for antigen-free diet.**

|                                                     |            |
|-----------------------------------------------------|------------|
| <u>Aqueous Solution 1</u>                           |            |
| <i>Add to sterile nanopure water at 70 °C</i>       | <u>g/L</u> |
| 0.36 L H <sub>2</sub> O                             |            |
| Dextrose (Sigma D9434)                              | 220        |
|                                                     |            |
| <u>Aqueous Solution 2</u>                           |            |
| <i>Add to sterile nanopure water at 70 °C</i>       |            |
| 0.64 L H <sub>2</sub> O                             |            |
| Leucine (Sigma L8000)                               | 5.775      |
| Phenylalanine (Sigma P2126)                         | 2.25       |
| Isoleucine (Sigma I2752)                            | 3.3        |
| Methionine (Sigma M9625)                            | 4.8        |
| Tryptophan (Sigma T0254)                            | 1.125      |
| Valine (Sigma V0500)                                | 4.1        |
| Asparagine (Sigma A0884)                            | 3.75       |
| Arginine-HCl (Sigma A5131)                          | 2.775      |
| Threonine (Sigma T8625)                             | 2.25       |
| Lysine-HCl (Sigma L5626)                            | 5.4        |
| Histidine-HCl*H <sub>2</sub> O (Sigma H5659)        | 2.25       |
|                                                     |            |
| <i>Cool to 45C, add the following:</i>              |            |
| Glycine (Sigma G7126)                               | 1.8        |
| Proline (Sigma P0380)                               | 4.5        |
| Serine (Sigma A0884)                                | 4.05       |
| Alanine (Sigma A7627)                               | 1.8        |
| Na-Glutamate (Sigma G1626)                          | 10.35      |
| Ethyl L-tyrosinate HCl (Sigma T4879)                | 1.875      |
| Ferrous gluconate (Sigma 344427)                    | 0.15       |
| Mn acetate tetrahydrate (Sigma 229776)              | 0.1662     |
| ZnSO <sub>4</sub> *H <sub>2</sub> O (Sigma 96495)   | 0.1218     |
| Cu acetate*H <sub>2</sub> O (Sigma 217557)          | 1.11E-02   |
| Cr acetate*H <sub>2</sub> O (Santa Cruz sc-227648)  | 7.50E-03   |
| NaF (Sigma 201154)                                  | 6.30E-03   |
| SnSO <sub>4</sub> *2H <sub>2</sub> O (Sigma 244635) | 1.11E-03   |
| Ammonium molybdate tetrahydrate (Sigma 09880)       | 1.11E-03   |
| NiCl <sub>2</sub> hydrate (Sigma 364304)            | 1.11E-03   |
| Cobalt acetate tetrahydrate (Sigma 403024)          | 3.30E-04   |
| Sodium orthovanadate (Sigma 450243)                 | 6.60E-04   |
| Sodium selenate (Sigma S5261)                       | 2.88E-04   |



|                                                            |          |
|------------------------------------------------------------|----------|
|                                                            |          |
| <i>Cool to 4 °C, add the following:</i>                    |          |
| Ca glycerophosphate (Sigma G6626)                          | 15.9     |
| Mg glycerophosphate (Sigma 17766)                          | 4.35     |
| CaCl <sub>2</sub> *2H <sub>2</sub> O (Sigma 3881)          | 0.5625   |
| NaCl (Sigma S9888)                                         | 0.1778   |
| KI (Sigma 207969)                                          | 1.42E-03 |
| K acetate (Sigma P1190)                                    | 5.625    |
| Choline HCl (Sigma C1879)                                  | 0.95     |
| Vitamin B12 (Sigma V2876)                                  | 4.72E-03 |
| Biotin (Sigma B4501)                                       | 8.20E-04 |
| Folic acid (Sigma 7876)                                    | 1.23E-03 |
| Thiamine HCl (Sigma T4625)                                 | 4.10E-03 |
| Pyridoxine HCl (Sigma 9755)                                | 5.13E-03 |
| Riboflavin (Sigma R4500)                                   | 6.15E-03 |
| Niacinamide (Sigma N5535)                                  | 3.08E-02 |
| D-Pantothenic acid (Sigma 21210)                           | 4.10E-02 |
| myo-Inositol (Sigma I5125)                                 | 2.05E-01 |
|                                                            |          |
| <i>Combine both solutions at 4 °C &amp; sterile filter</i> |          |
|                                                            |          |
| <u>Lipid Solution</u>                                      |          |
| Soybean oil (Sigma S7381)                                  |          |
| Retinyl palmitate (Sigma R3375)                            | 1.87E-01 |
| Cholecalciferol (Sigma C9756)                              | 5.00E-04 |
| Vitamin K (Sigma V3501)                                    | 0.675    |
| DL-tocopherol acetate (Sigma T3376)                        | 20       |
| DL-tocopherol (Sigma 258024)                               | 10       |
|                                                            |          |
| <i>Warm to 50 °C prior to sterile filtration</i>           |          |

## Online supplementary files

**Database S1. List of mAbs.** Excel file listing name, cellular origin, microbiota-reactivity, polyreactivity, variable gene usage, and sequences of antibodies used in this study. Sequence characteristics were determined using IMGT ([www.imgt.org](http://www.imgt.org)).
